# Supplementary material
Source: PubMed Central journal article supplement (PMC3390860)
Supplement: 1118378109_pnas.201118378SI.pdf [file 1118378109_pnas.201118378SI.pdf]

# Supporting Information

Westerman et al. 10.1073/pnas.1118378109

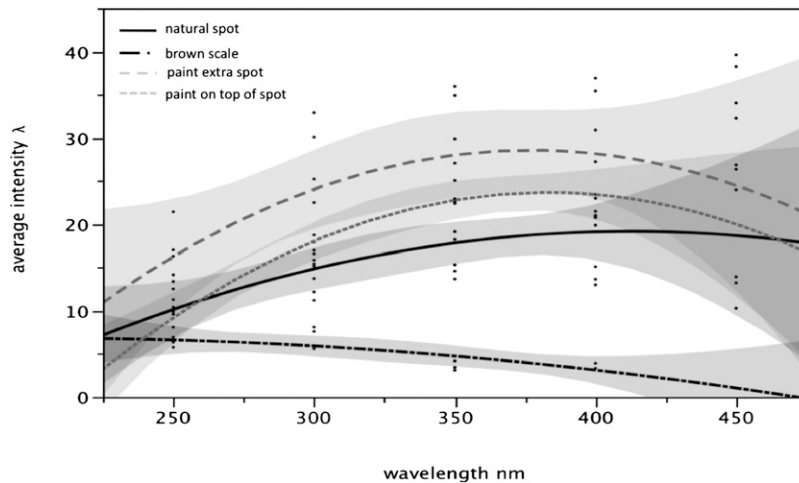

**Fig. S1.** Average UV reflectance spectra of dorsal spots with 95% confidence interval curves.  $n = 5$  butterflies per spot,  $n = 3$  for brown scales. Each butterfly was sampled three times. All spots, painted or natural, reflect in the UV ( $<400$  nm), but brown scales do not. In the experiment with manipulated wild-type (Wt) and painted spots, females chose between a male with the two dorsal eyespot centers painted over (“paint on top of spot” spectra; painted Cu1 eyespot center measured above) and a male with two spots exhibiting the “natural spot” spectra plus two spots exhibiting the ectopic spot spectra (“paint extra spot”).

**Table S1. Impact of training male behavior on female mating outcome using a compound measure of male behavior (principle component analysis)**

| Principle component | 2 UV spot |                | 4 UV spot |                | 1 UV spot |                | 0 UV spot |                |
|---------------------|-----------|----------------|-----------|----------------|-----------|----------------|-----------|----------------|
|                     | $\chi^2$  | <i>P</i> value |
| PC1                 | 2.27      | 0.132          | 0.58      | 0.447          | 0.05      | 0.831          | 1.16      | 0.281          |
| PC2                 | 0.01      | 0.923          | 0.18      | 0.667          | 1.14      | 0.280          | 0.32      | 0.572          |

The  $\chi^2$  statistics depicted below are the result of a logistic regression of training male behavior on female mating outcome for each training male phenotype. Control two UV spot males from all experiments,  $n = 77$ ; four UV spot  $n = 25$ , one UV spot, and zero UV spot,  $n = 26$ .

**Table S2. Analysis of power of observed mating patterns**

| Compared treatments | Difference in proportion mated wild-type | Sample size used in experiments | Sample size required for $\alpha = 0.05$ , $\beta = 0.80$ |
|---------------------|------------------------------------------|---------------------------------|-----------------------------------------------------------|
| Naïve vs. 4 UV      | 0.52                                     | 51                              | 34                                                        |
| 2 UV vs. 4 UV       | 0.49                                     | 51                              | 38                                                        |
| Naïve vs. 1 UV      | 0.05                                     | 50                              | 3,209                                                     |
| 2 UV vs. 1 UV       | 0.08                                     | 50                              | 1,655                                                     |
| Naïve vs. 0 UV      | 0.02                                     | 52                              | 8,809                                                     |
| 2 UV vs. 0 UV       | 0.11                                     | 50                              | 682                                                       |

Sample sizes determined using a power analysis for detecting a difference between two proportions, with a continuity correction to the sample size formula based on the normal approximation to the binomial distribution. Analysis performed in JavaStat.

**Table S3. Effect of zero-spot training male behavior on female mating patterns**

| Male behavior | Parameter estimate | Effect likelihood ratio test |                |
|---------------|--------------------|------------------------------|----------------|
|               |                    | $\chi^2$                     | <i>P</i> value |
| Flutters      | 0.558              | 12.280                       | 0.0005         |
| Courting      | 1.561              | 6.142                        | 0.013          |
| Flights       | -0.451             | 16.098                       | <0.0001        |
| Circling      | -4.202             | 12.434                       | 0.0004         |

Stepwise nominal logistic model, best model contains flutters, courting, flights, and circling. Whole-model test:  $\chi^2 = 21.867$ , *P* = 0.002, generalized *R*<sup>2</sup> = 0.778.

**Table S4. Comparison of training male behaviors**

| Training male behavior | $\chi^2$ | <i>df</i> | <i>P</i> value |
|------------------------|----------|-----------|----------------|
| Flutter                | 10.1674  | 5         | 0.0706         |
| Flight                 | 8.0806   | 5         | 0.1518         |
| Walk                   | 11.0535  | 5         | 0.0503         |
| Circle                 | 5.2769   | 5         | 0.3830         |
| Court                  | 4.5518   | 5         | 0.4730         |
| PC1                    | 1.3649   | 5         | 0.9281         |
| PC2                    | 6.8731   | 5         | 0.2302         |

Kruskal–Wallis test of training male behavior across treatments. Each control two UV spot treatment was treated separately, giving us a total of six treatments: signal enhancement, signal enhancement control, ancestral state, ancestral state control, no UV spots, no UV spot control.

**Table S5. Principle component analysis of training male activity**

| Loading                 | 2UV Sp |        | 4 UV Sp |        | 1 UV Sp |       | 0 UV Sp |       |
|-------------------------|--------|--------|---------|--------|---------|-------|---------|-------|
|                         | PC1    | PC2    | PC1     | PC2    | PC1     | PC2   | PC1     | PC2   |
| Fluttering              | 0.575  | -0.110 | 0.597   | -0.022 | 0.597   | 0.059 | 0.615   | 0.067 |
| Walking                 | 0.518  | -0.143 | 0.556   | 0.067  | 0.558   | 0.008 | 0.522   | 0.136 |
| Flying                  | 0.551  | -0.174 | 0.564   | -0.052 | 0.567   | 0.069 | 0.579   | 0.015 |
| Circling                | 0.304  | 0.600  | 0.093   | 0.701  | -0.016  | 0.724 | -0.100  | 0.697 |
| Courting                | 0.067  | 0.759  | -0.085  | 0.707  | -0.099  | 0.684 | -0.077  | 0.700 |
| Variation explained (%) | 54.14  | 27.31  | 53.86   | 27.56  | 51.65   | 23.59 | 50.99   | 27.83 |

Principle component (PC)1 loadings are comprised of roughly equal proportions of flutterings, walking, and flying behaviors, and PC2 loadings comprise male circling and courting behaviors. Sp, spotty.
